# Supplementary material for: A WIN Consortium phase I study exploring avelumab, palbociclib, and axitinib in advanced non‐small cell lung cancer
Source: PubMed Central journal article supplement (PMC9302335; doi:10.1002/cam4.4635), 2022-03-20

**Supplemental Figure 1.**

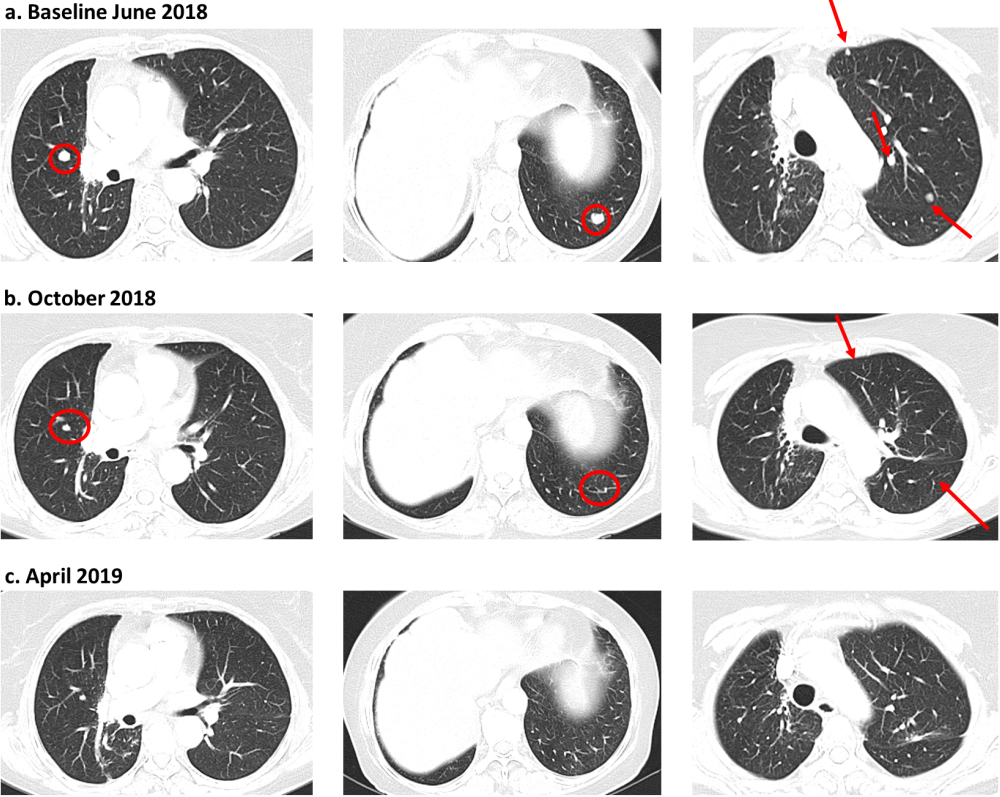

Supplement: CAM4-11-2790-s002.pdf [file CAM4-11-2790-s002.pdf]
